# Supplementary material
Source: PubMed Central journal article supplement (PMC10102921)
Supplement: jamaophthalmol-e230610-s002.pdf [file jamaophthalmol-e230610-s002.pdf]

## **Data Sharing Statement**

### **Data**

**Data available:** No
